# Supplementary material for: Impact of Cork Closures on the Volatile Profile of Sparkling Wines during Bottle Aging
Source: MDPI journal article supplement (doi:10.3390/foods11030293), 2022-01-22
Supplement: s1 [file s1]

## **Supplementary Material**

### **Impact of cork closures on the volatile profile of sparkling wines during bottle aging**

Filipa Amaro <sup>1,2</sup>, Joana Almeida <sup>1,2</sup>, Ana Sofia Oliveira <sup>2</sup>, Isabel Furtado <sup>2</sup>, Maria de Lourdes Bastos <sup>1,2</sup>, Paula Guedes de Pinho <sup>1,2,\*</sup>, Joana Pinto <sup>1,2,\*</sup>

<sup>1</sup> Associate Laboratory i4HB - Institute for Health and Bioeconomy, Department of Biological Sciences, Laboratory of Toxicology, Faculty of Pharmacy, University of Porto, 4050-313 Porto, Portugal

<sup>2</sup> UCIBIO/REQUIMTE, Department of Biological Sciences, Laboratory of Toxicology, Faculty of Pharmacy, University of Porto, 4050-313 Porto, Portugal

\*Corresponding authors:

jipinto@ff.up.pt (J.P)

pguedes@ff.up.pt (P.G.P)

Address:

Associate Laboratory i4HB - Institute for Health and Bioeconomy

Laboratory of Toxicology, Department of Biological Sciences

Faculty of Pharmacy, University of Porto

Rua Jorge Viterbo Ferreira, 228

4050-313 Porto, Portugal

Tel.: +351 220428599; fax: +351 226093390

**Table S1.** Concentrations of other volatile organic compounds determined in sparkling wine #1, during bottle aging (12 to 42 months), for which no significant change was observed according to the type of closure.

| Class/Compound          | 12 months <sup>1</sup> |             | 24 months <sup>1</sup> |               | 42 months <sup>1</sup> |             | Units | Descriptors <sup>2</sup>    |
|-------------------------|------------------------|-------------|------------------------|---------------|------------------------|-------------|-------|-----------------------------|
|                         | 2D                     | MA          | 2D                     | MA            | 2D                     | MA          |       |                             |
| Alcohols                |                        |             |                        |               |                        |             |       |                             |
| Isoamyl alcohol         | 188 ± 34               | 157 ± 41    | 243 ± 7                | 252 ± 5       | 766 ± 68               | 573 ± 357   | mg/L  | Banana, burnt cheese        |
| 1-Octanol               | 5.19 ± 0.08            | 4.79 ± 0.26 | 4.69 ± 0.30            | 4.48 ± 0.21   | 38.1 ± 2.04            | 34.3 ± 8.48 | µg/L  | Rose, waxy                  |
| Phenylethyl alcohol     | 53.9 ± 3.8             | 59.0 ± 12.9 | 19.3 ± 0.1             | 19.7 ± 2.2    | 38.7 ± 10.2            | 29.2 ± 11.4 | mg/L  | Rose, honey                 |
| 1-Decanol               | 33.2 ± 0.2             | 21.7 ± 15.4 | 36.9 ± 9.2             | 29.4 ± 5.0    | 26.2 ± 9.7             | 14.3 ± 10.3 | µg/L  | Floral, fruity, waxy        |
| Aldehydes               |                        |             |                        |               |                        |             |       |                             |
| Benzaldehyde            | 18.3 ± 1.9             | 19.1 ± 1.9  | 24.2 ± 2.1             | 24.2 ± 1.4    | 24.3 ± 6.8             | 17.2 ± 9.2  | µg/L  | Almond, bitter, burnt sugar |
| Octanal                 | 0.24 ± 0.18            | ND          | BLOQ                   | BLOQ          | 0.78 ± 1.34            | 1.09 ± 1.44 | µg/L  | Citrus, fatty               |
| Phenylacetaldehyde      | 13.8 ± 0.5             | 13.9 ± 0.3  | 35.5 ± 2.5             | 31.6 ± 0.8    | 86.9 ± 21.8            | 66.7 ± 21.2 | µg/L  | Bitter, green, honey        |
| Nonanal                 | 3.73 ± 1.78            | 1.61 ± 0.06 | 8.86 ± 4.61            | 6.68 ± 3.63   | 30.10 ± 34.2           | 36.3 ± 31.6 | µg/L  | Green, pungent              |
| Decanal                 | 8.21 ± 5.70            | 2.78 ± 1.48 | 3.68 ± 1.95            | 1.66 ± 0.47   | 1.69 ± 0.53            | 1.54 ± 0.91 | µg/L  | Grassy, orange              |
| β-Cyclocitral           | 8.93 ± 0.02            | 8.92 ± 0.02 | 0.118 ± 0.204          | 0.147 ± 0.255 | ND                     | ND          | µg/L  | Floral, sweet               |
| Esters                  |                        |             |                        |               |                        |             |       |                             |
| Ethyl 2-methylbutanoate | 6.55 ± 5.02            | 9.24 ± 4.25 | 14.4 ± 10.1            | 22.2 ± 6.8    | 30.0 ± 8.2             | 11.0 ± 8.9  | µg/L  | Apple                       |
| Isoamyl acetate         | 275 ± 189              | 376 ± 157   | 82 ± 42                | 132 ± 42      | 623 ± 142              | 284 ± 191   | µg/L  | Banana, sweet, fruity       |
| Hexyl acetate           | 2.18 ± 0.05            | 1.90 ± 0.27 | BLOQ                   | BLOQ          | 0.20 ± 0.17            | 0.11 ± 0.19 | µg/L  | Cherry, pear                |
| Ethyl hexanoate         | 0.89 ± 0.15            | 0.69 ± 0.16 | 0.49 ± 0.29            | 0.74 ± 0.22   | 3.83 ± 1.60            | 1.60 ± 1.02 | mg/L  | Apple, banana               |
| Ethyl heptanoate        | 3.25 ± 0.09            | 3.35 ± 0.06 | 0.31 ± 0.19            | 0.40 ± 0.25   | 2.73 ± 0.32            | 2.18 ± 0.45 | µg/L  | Fruity, melon               |
| Diethyl succinate       | 14.7 ± 1.5             | 13.8 ± 1.5  | 27.9 ± 0.6             | 28.0 ± 2.1    | 88.7 ± 15.6            | 85.6 ± 6.9  | mg/L  | Fruity                      |
| Ethyl octanoate         | 1.86 ± 0.45            | 1.16 ± 0.37 | 0.49 ± 0.24            | 0.52 ± 0.15   | 5.43 ± 3.41            | 3.60 ± 1.55 | mg/L  | Pineapple, sweet            |
| Phenylethyl acetate     | 25.4 ± 0.6             | 23.9 ± 1.0  | 6.2 ± 0.3              | 5.9 ± 0.3     | 4.4 ± 0.25             | 4.1 ± 0.8   | µg/L  | Rose, violet                |

|                       |             |             |             |             |             |             |      |                          |
|-----------------------|-------------|-------------|-------------|-------------|-------------|-------------|------|--------------------------|
| Ethyl nonanoate       | 9.5 ± 0.4   | 10.0 ± 0.8  | 3.5 ± 0.6   | 3.1 ± 0.8   | 33.6 ± 7.0  | 30.3 ± 10.2 | µg/L | Rose, fruity             |
| Ethyl decanoate       | 226 ± 22    | 204 ± 8     | 24.5 ± 7.9  | 13.1 ± 3.3  | 29.1 ± 20.4 | 31.7 ± 18.7 | µg/L | Brandy, fruity           |
| <b>Furans</b>         |             |             |             |             |             |             |      |                          |
| Furfural              | 0.85 ± 0.09 | 0.76 ± 0.04 | 1.49 ± 0.18 | 1.61 ± 0.11 | 3.70 ± 0.87 | 3.09 ± 2.14 | mg/L | Almond, bread            |
| 5-Methyl-2-furfural   | 43.1 ± 3.9  | 34.5 ± 3.4  | 28 ± 2.4    | 26.4 ± 1.7  | 42.6 ± 5.4  | 41.1 ± 11.2 | µg/L | Almond, burnt sugar      |
| <b>Ketones</b>        |             |             |             |             |             |             |      |                          |
| 2-Heptanone           | 0.26 ± 0.08 | 0.18 ± 0.07 | 1.93 ± 1.03 | 2.53 ± 0.51 | 5.53 ± 2.02 | 3.09 ± 2.22 | µg/L | Sweet, fruity, woody     |
| 2-Nonanone            | 1.75 ± 0.95 | 2.14 ± 1.05 | 3.72 ± 1.24 | 4.06 ± 0.73 | 3.23 ± 1.35 | 1.91 ± 1.64 | µg/L | Sweet, herbal            |
| <b>Terpenes</b>       |             |             |             |             |             |             |      |                          |
| α-Pinene              | BLOQ        | BLOQ        | ND          | ND          | ND          | ND          | -    | Pine                     |
| 1,4-Cineole           | 39.3 ± 28.6 | 64.7 ± 19.6 | BLOQ        | BLOQ        | ND          | ND          | ng/L | Minty, pine              |
| Limonene              | 3.03 ± 3.40 | 0.61 ± 0.20 | ND          | ND          | ND          | ND          | µg/L | Flowery, green, citrus   |
| Eucalyptol            | 0.90 ± 1.06 | 0.09 ± 0.07 | BLOQ        | BLOQ        | ND          | 0.57 ± 0.99 | µg/L | Fresh, mint, eucalyptus  |
| Linalool oxide        | 238 ± 238   | 66 ± 12     | 48 ± 16     | 42 ± 8      | 188 ± 132   | 128 ± 52    | µg/L | Citrus, green            |
| β-Linalool            | 21.8 ± 4.4  | 18.4 ± 0.2  | ND          | ND          | ND          | ND          | µg/L | Flower, muscat, lavender |
| <b>Norisoprenoids</b> |             |             |             |             |             |             |      |                          |
| α-Ionone              | ND          | ND          | 1.34 ± 0.1  | 1.20 ± 0.1  | 2.4 ± 0.3   | 2.2 ± 0.8   | µg/L | Fruity, violet           |

<sup>1</sup> Average concentration and standard deviation of sparkling wine #1 sealed with a sparkling cork with two natural cork discs (2D) and a microagglomerated cork (MA). A *n*=3 per closure was considered at 12 and 42 months, and a *n*= 4 at 24 months. <sup>2</sup> Descriptors reported in references [21,22]. BLOQ – below limit of quantification, ND – not detected, Q – qualitative alteration.

**Table S2.** Concentrations of other volatile organic compounds determined in sparkling wine #2, during bottle aging (12 to 42 months), for which no significant change was observed according to the type of closure.

| Class/Compounds         | 12 months <sup>1</sup> |             | 24 months <sup>1</sup> |             | 42 months <sup>1</sup> |             | Units | Descriptors <sup>2</sup>    |
|-------------------------|------------------------|-------------|------------------------|-------------|------------------------|-------------|-------|-----------------------------|
|                         | 2D                     | MA          | 2D                     | MA          | 2D                     | MA          |       |                             |
| Alcohols                |                        |             |                        |             |                        |             |       |                             |
| Isoamyl alcohol         | 71 ± 12                | 63 ± 6      | 252 ± 7                | 249 ± 11    | 544 ± 315              | 489 ± 117   | mg/L  | Banana, burnt fruit, cheese |
| 3-Hexen-1-ol            | ND                     | ND          | 22.8 ± 5.4             | 23.2 ± 2.2  | 18.7 ± 17.8            | 9.4 ± 16.2  | µg/L  | Green, leafy                |
| 1-Hexanol               | 0.26 ± 0.01            | 0.27 ± 0.01 | 5.75 ± 0.30            | 5.53 ± 0.18 | 1.77 ± 0.99            | 1.56 ± 0.25 | mg/L  | Green, fruity               |
| 1-Octanol               | 6.21 ± 0.41            | 6.43 ± 0.62 | 6.72 ± 0.67            | 6.39 ± 1.04 | 33.6 ± 20.5            | 34.7 ± 2.9  | µg/L  | Rose, waxy                  |
| Phenylethyl alcohol     | 70.7 ± 12.2            | 62.9 ± 5.9  | 17.9 ± 3.2             | 19.8 ± 2.1  | 35.3 ± 20.4            | 30.3 ± 10.5 | mg/L  | Rose, honey                 |
| 1-Decanol               | 35.4 ± 4.9             | 33.0 ± 0.3  | 44.1 ± 13.9            | 43.3 ± 11.4 | 9.81 ± 11.6            | 4.63 ± 6.8  | µg/L  | Floral, fruity, waxy        |
| Aldehydes               |                        |             |                        |             |                        |             |       |                             |
| Benzaldehyde            | 30.4 ± 1.5             | 32.0 ± 2.7  | 36.7 ± 4.3             | 43.9 ± 5.7  | 25.9 ± 17.4            | 24.6 ± 3.6  | µg/L  | Almond, bitter, burnt sugar |
| Octanal                 | 107 ± 132              | 77 ± 154    | BLOQ                   | BLOQ        | 4 ± 6                  | BLOQ        | ng/L  | Citrus, fatty               |
| Phenylacetaldehyde      | 34.4 ± 1.3             | 33.9 ± 1.7  | 32.2 ± 8.1             | 38.9 ± 3.4  | 89.8 ± 52.6            | 75.2 ± 21.2 | µg/L  | Bitter, green, honey        |
| Nonanal                 | 3.69 ± 2.32            | 4.89 ± 3.86 | 7.65 ± 7.09            | 14.3 ± 8.0  | 6.66 ± 7.76            | 6.45 ± 11.2 | µg/L  | Green, pungent              |
| Decanal                 | 1.61 ± 0.47            | 1.79 ± 1.02 | 2.20 ± 1.63            | 3.45 ± 0.73 | 2.11 ± 0.51            | 1.84 ± 1.00 | µg/L  | Grassy, orange              |
| β-Cyclocitral           | 8.95 ± 0.01            | 8.95 ± 0.01 | 0.32 ± 0.32            | 0.19 ± 0.33 | ND                     | ND          | µg/L  | Floral, sweet               |
| Esters                  |                        |             |                        |             |                        |             |       |                             |
| Ethyl isobutanoate      | 113 ± 27               | 104 ± 13    | 192 ± 35               | 161 ± 56    | 122 ± 76               | 100 ± 19    | µg/L  | Fruity                      |
| Ethyl butanoate         | 0.44 ± 0.10            | 0.48 ± 0.05 | 0.65 ± 0.09            | 0.61 ± 0.18 | 2.56 ± 1.49            | 2.26 ± 0.29 | mg/L  | Fruity, sweet, apple        |
| Ethyl 2-methylbutanoate | 26.1 ± 6.9             | 25.2 ± 2.0  | 51.4 ± 9.2             | 49.3 ± 11.0 | 32.2 ± 17.6            | 24.0 ± 8.6  | µg/L  | Apple                       |
| Ethyl isovalerate       | 43 ± 10                | 42 ± 5      | 174 ± 29               | 144 ± 49    | 705 ± 393              | 567 ± 85    | µg/L  | Fruity, sweet, spice        |
| Isoamyl acetate         | 102 ± 22               | 101 ± 11    | 141 ± 20               | 118 ± 36    | 433 ± 265              | 323 ± 51    | µg/L  | Banana, sweet, fruity       |
| Hexyl acetate           | 1.33 ± 0.07            | 1.38 ± 0.09 | BLOQ                   | BLOQ        | 0.13 ± 0.23            | BLOQ        | µg/L  | Cherry, pear                |
| Ethyl hexanoate         | 1.16 ± 0.24            | 0.91 ± 0.39 | 1.43 ± 0.21            | 1.20 ± 0.40 | 3.80 ± 1.09            | 3.28 ± 0.56 | mg/L  | Apple, banana               |
| Ethyl heptanoate        | 3.58 ± 0.11            | 3.53 ± 0.07 | 1.15 ± 0.19            | 0.84 ± 0.21 | 2.80 ± 0.65            | 2.82 ± 0.27 | µg/L  | Fruity, melon               |

|                       |             |             |             |             |              |              |      |                          |
|-----------------------|-------------|-------------|-------------|-------------|--------------|--------------|------|--------------------------|
| Diethyl succinate     | 27.6 ± 2.3  | 26.9 ± 1.5  | 33.5 ± 4.0  | 35.8 ± 1.8  | 104 ± 22.8   | 124 ± 5.7    | mg/L | Fruity                   |
| Phenylethyl acetate   | 26.3 ± 1.2  | 26.6 ± 1.8  | 8.0 ± 0.7   | 8.0 ± 0.3   | 5.6 ± 1.7    | 5.3 ± 0.3    | µg/L | Rose, violet             |
| Ethyl nonanoate       | 6.0 ± 0.3   | 6.0 ± 0.5   | 2.0 ± 0.6   | 1.5 ± 0.4   | 22.6 ± 14.6  | 20.9 ± 3.2   | µg/L | Rose, fruity             |
| <b>Furans</b>         |             |             |             |             |              |              |      |                          |
| Furfural              | 1.77 ± 0.19 | 1.77 ± 0.24 | 4.12 ± 0.33 | 4.25 ± 0.18 | 4.62 ± 2.78  | 4.16 ± 0.99  | mg/L | Almond, bread            |
| 5-Methyl-2-furfural   | 110 ± 15    | 96 ± 16     | 52 ± 4      | 51 ± 2      | 52 ± 27      | 51 ± 2       | µg/L | Almond, burnt sugar      |
| <b>Ketones</b>        |             |             |             |             |              |              |      |                          |
| 2-Heptanone           | 0.34 ± 0.06 | 0.43 ± 0.10 | 2.05 ± 0.23 | 1.81 ± 0.44 | 3.36 ± 2.01  | 2.77 ± 1.80  | µg/L | Sweet, fruity, woody     |
| 2-Nonanone            | 1.99 ± 0.40 | 2.90 ± 0.77 | 3.51 ± 0.26 | 4.04 ± 1.40 | 1.01 ± 0.66  | 1.39 ± 0.35  | µg/L | Sweet, herbal            |
| 2-Undecanone          | 0.09 ± 0.04 | 0.06 ± 0.04 | BLOQ        | BLOQ        | 3.98 ± 1.01  | 1.15 ± 1.56  | µg/L | Waxy, fruity             |
| <b>Terpenes</b>       |             |             |             |             |              |              |      |                          |
| α-Pinene              | ND          | ND          | ND          | ND          | ND           | ND           | -    | Pine                     |
| 1,4-Cineole           | ND          | ND          | ND          | ND          | ND           | ND           | -    | Minty, pine              |
| Limonene              | 507 ± 107   | 655 ± 158   | ND          | ND          | ND           | ND           | ng/L | Flowery, green, citrus   |
| Eucalyptol            | 55.7 ± 14.4 | 60.4 ± 41.8 | BLOQ        | BLOQ        | ND           | 572 ± 991    | ng/L | Fresh, mint, eucalyptus  |
| Linalool oxide        | 49.3 ± 14.1 | 64.8 ± 17.7 | 33.2 ± 7.5  | 44.2 ± 20.3 | 179.0 ± 93.9 | 131.0 ± 55.7 | µg/L | Citrus, green            |
| β-Linalool            | 21.8 ± 4.4  | 18.4 ± 0.2  | ND          | ND          | ND           | ND           | µg/L | Flower, muscat, lavender |
| <b>Norisoprenoids</b> |             |             |             |             |              |              |      |                          |
| β-Damascenone         | 2.31 ± 0.03 | 2.31 ± 0.05 | 1.53 ± 0.13 | 1.58 ± 0.13 | 3.17 ± 0.67  | 2.82 ± 0.06  | µg/L | Woody, floral, herbal    |
| α-Ionone              | ND          | ND          | 1.01 ± 0.04 | 1.13 ± 0.11 | 1.45 ± 0.67  | 1.28 ± 0.07  | µg/L | Fruity, violet           |

<sup>1</sup> Average concentration and standard deviation of sparkling wine #2 sealed with sparkling cork stopper with two natural cork discs (2D) and a microagglomerated cork (MA). A *n*=5 per closure was considered at 12 months, a *n*=4 at 24 months, and a *n*=3 at 42 months. <sup>2</sup> Descriptors reported in references [21,22]. BLOQ – below limit of quantification, ND – not detected, Q – qualitative alteration.
